# Supplementary material for: Mulberry-like gold nanospheres supported on graphene nanosheets: one-pot synthesis, characterization and photoelectrochemical property
Source: Royal Society of Chemistry journal article supplement (doi:10.1039/c4nj00057a), 2014-01-01
Supplement: c4nj00057a1.pdf [file c4nj00057a1.pdf]

## **Electronic Supplementary Information**

**Mulberry-like gold nanospheres supported on graphene nanosheets:  
One-pot synthesis, characterization and photoelectrochemical  
property**

**Picheng Gao, Hongmin Ma, Tao Yan, Dawei Fan, Lihua Hu, Bin Du**

**and Qin Wei\***

*Key Laboratory of Chemical Sensing & Analysis in Universities of Shandong, School  
of Chemistry and Chemical Engineering, University of Jinan, Jinan 250022, China*

\*Corresponding author. Tel.: +86 531 8276 7872. E-mail address:  
sdjndxwq@163.com (Q. Wei).

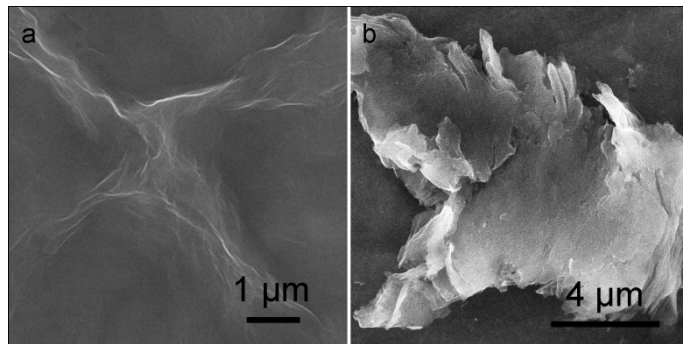

**Fig. S1.** SEM image of GO with (a) high and (b) low magnification.

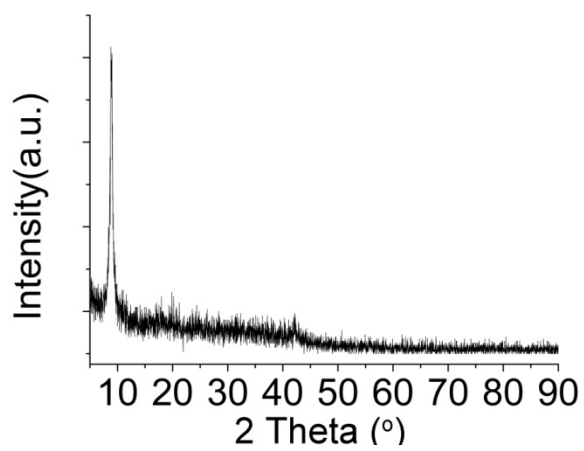

**Fig. S2.** XRD pattern of GO.

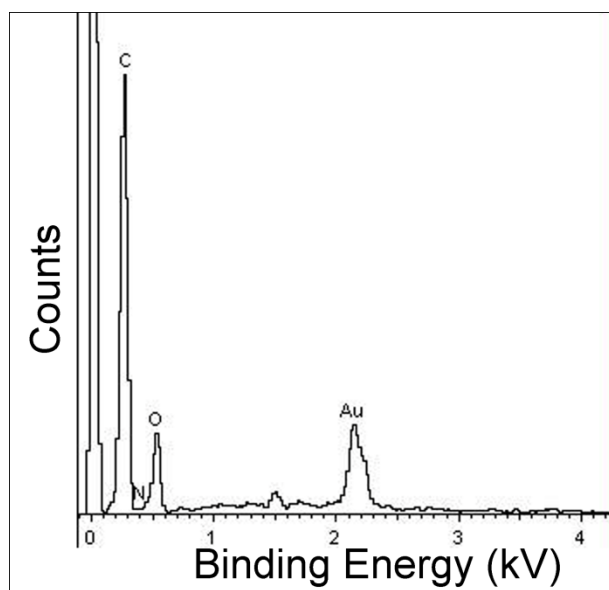

**Fig. S3.** EDX spectrum of MGNS/GNs.

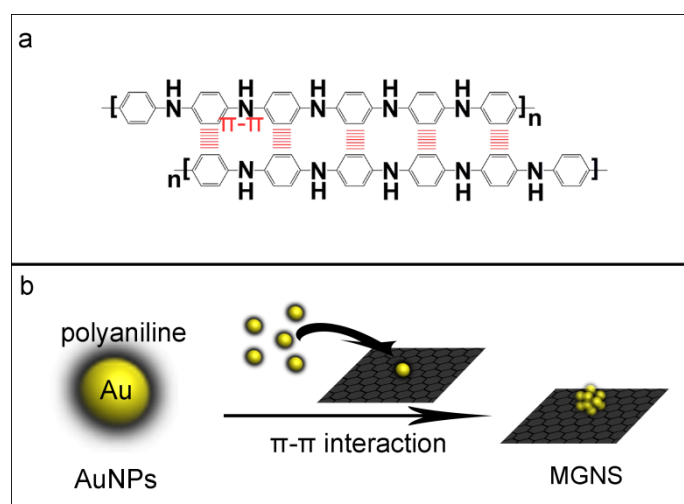

**Fig. S4.** Schematic illustration of (a)  $\pi-\pi$  stacking interaction of PANI and (b) formation of MGNS.

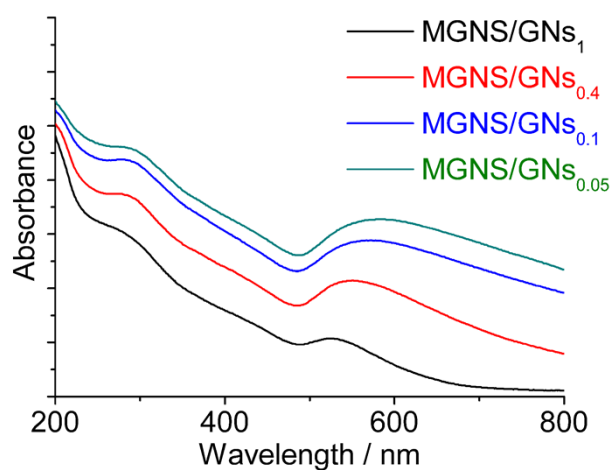

**Fig. S5.** UV-vis spectra of MGNS/GNs<sub>1</sub>, MGNS/GNs<sub>0.4</sub>, MGNS/GNs<sub>0.1</sub> and MGNS/GNs<sub>0.05</sub>.

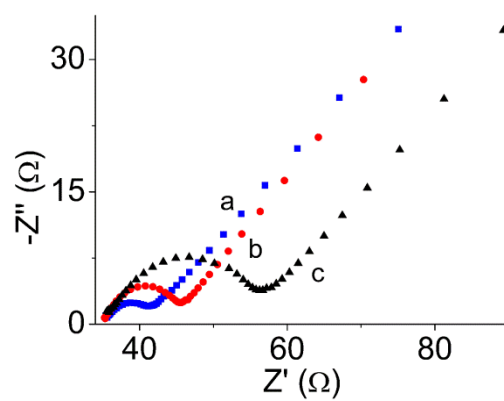

**Fig. S6.** Nyquist diagrams for EIS of ITO electrode in a solution of 0.1 mol/L KNO<sub>3</sub> containing 5 mmol/L Fe(CN)<sub>6</sub><sup>3-</sup> and 5 mmol/L Fe(CN)<sub>6</sub><sup>4-</sup>. (a) Bare ITO electrode, (b) APTES modified ITO electrode and (c) MGNS/GNs modified ITO electrode.
